# Supplementary material for: Density-adjusted liquid-phase microextraction with smartphone digital image colorimetry to determine parathion-methyl in water, fruit juice, vinegar, and fermented liquor
Source: Royal Society of Chemistry journal article supplement (doi:10.1039/d2ra02760g), 2022-01-01
Supplement: d2ra02760g1.pdf [file d2ra02760g1.pdf]

Supplementary material

**Density-adjusted liquid-phase microextraction with smartphone  
digital image colorimetry to determine parathion-methyl in water,  
fruit juice, vinegar, and fermented liquor**

Xinyuan Bi<sup>a</sup>, Haijuan Jiang<sup>b,c</sup>, Xingle Guo<sup>b,c</sup>, Min Wang<sup>b,c</sup>, Yu Niu<sup>a</sup>, Liyan  
Jia<sup>b,c,\*</sup>, and Xu Jing<sup>b,c\*</sup>

<sup>a</sup> *Agricultural Economics and Management College, Shanxi Agricultural  
University, Taiyuan, Shanxi 030006, China*

<sup>b</sup> *College of Food Science and Engineering, Shanxi Agricultural University,  
Taigu, Shanxi 030801, China*

<sup>c</sup> *Graduate Education Innovation Center on Baijiu Bioengineering in Shanxi  
Province, Taigu, Shanxi 030801, China*

\*Corresponding author: E-mail: liyangjia1979@163.com (Liyan Jia), Phone number:  
(86) 0354-6288325; E-mail: x.jing@vip.163.com (Xu Jing), Phone number: (86)  
0354-6288325;

Number of pages: 4

Number of figures: 3

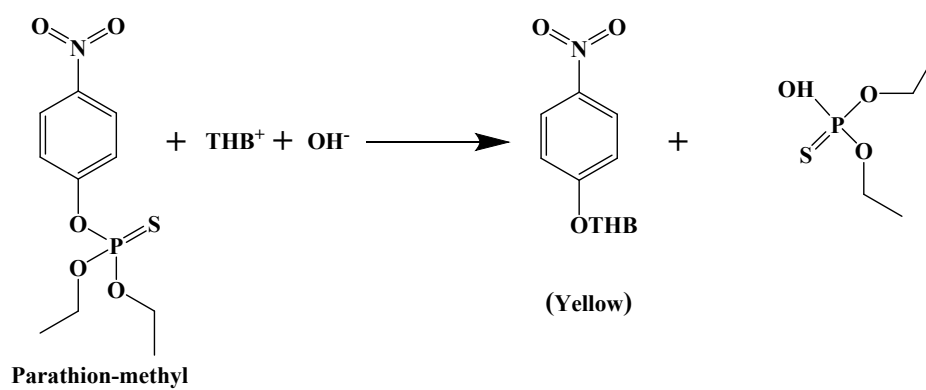

**Fig. S1.** Chromogenic reaction of parathion-methyl.

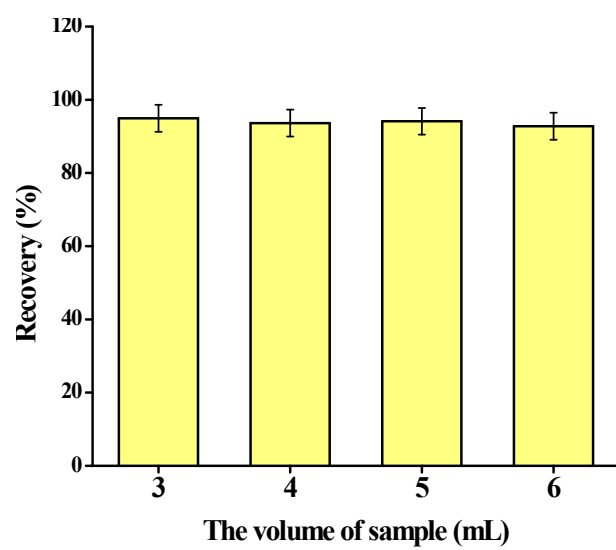

**Fig. S2.** Optimization of the volume of sample.

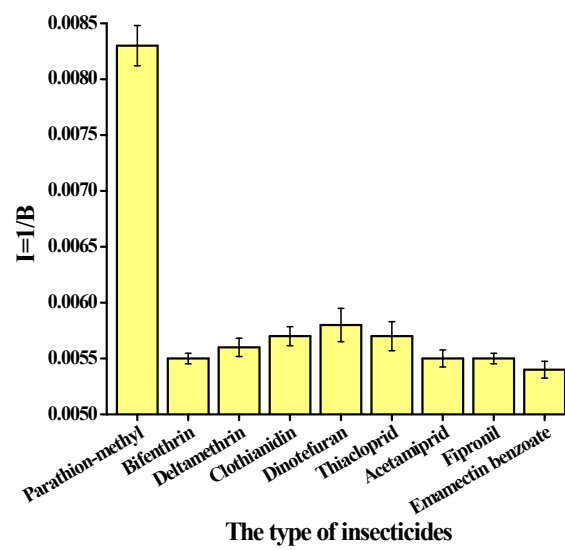

**Fig. S3.** The intensity of different insecticides: a, parathion-methyl; b, bifenthrin; c, deltamethrin; d, clothianidin; e, dinotefuran; f, thiacloprid; g, acetamiprid; h, fipronil; i, emamectin benzoate.
